# Supplementary material for: Carbon-doped freestanding TiO2nanotube arrays in dye-sensitized solar cells
Source: Royal Society of Chemistry journal article supplement (doi:10.1039/c6nj02615j), 2016-11-21
Supplement: c6nj02615j1.pdf [file c6nj02615j1.pdf]

## Supplementary Information

### Carbon-doped freestanding TiO<sub>2</sub> nanotube arrays in dye-sensitized solar cells

Won-Yeop Rho,<sup>a,b,+</sup> Ho-Sub Kim,<sup>b+</sup> Hyung-Mo Kim,<sup>a</sup> Jung Sang Suh,<sup>b</sup> Bong-Hyun Jun<sup>a,\*</sup>

a. Department of Bioscience and Biotechnology, Konkuk University, Seoul 143-701, Republic of Korea. E-mail: [bjun@konkuk.ac.kr](mailto:bjun@konkuk.ac.kr)

b. Department of Chemistry, Seoul National University, Seoul 151-747, Republic of Korea.

+ These authors contributed equally to the work

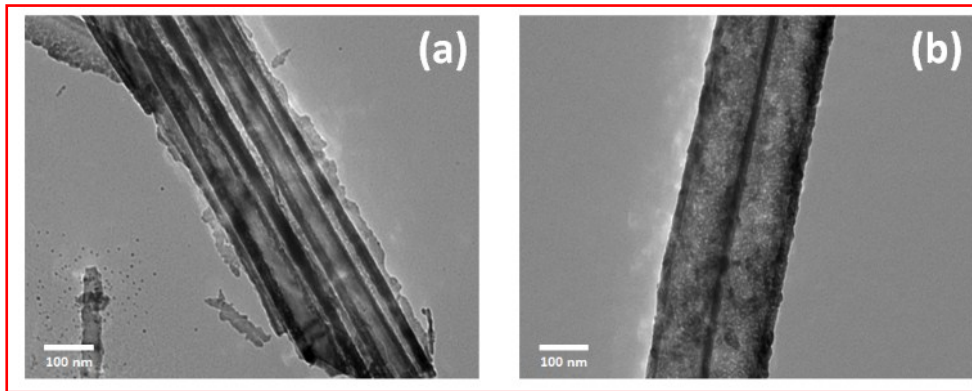

Fig. S1. TEM images of TiO<sub>2</sub> nanotube arrays (a) without carbon doping and (b) with carbon doping.

Fig. S1 shows TEM images of TiO<sub>2</sub> nanotube arrays with and without carbon doping. The channels of the undoped TiO<sub>2</sub> nanotube arrays were relatively clear and transparent, as shown in Fig. S1 a. Thus, the boundary lines and hollow cores can have highly different contrasts in TiO<sub>2</sub> nanotube arrays. However, after the carbon doping step the TiO<sub>2</sub> nanotube arrays were stained by a collection of small masses, as shown Fig. S1 b. These fully covered the TiO<sub>2</sub> nanotube arrays, causing the difference between the contrasts of the boundary lines and the hollow cores to decrease.
